# Supplementary material for: Brownness of organics in anthropogenic biomass burning aerosols over South Asia
Source: Copernicus journal article supplement (doi:10.5194/acp-24-13285-2024), 2024-12-02
Supplement: Supplementary file 1 [file acp-24-13285-2024-supplement.pdf]

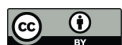

*Supplement of*

## **Brownness of organics in anthropogenic biomass burning aerosols over South Asia**

**Chimurkar Navinya et al.**

*Correspondence to:* Chandra Venkataraman ([chandra@iitb.ac.in](mailto:chandra@iitb.ac.in)) and Rajan K. Chakrabarty ([chakrabarty@wustl.edu](mailto:chakrabarty@wustl.edu))

The copyright of individual parts of the supplement might differ from the article licence.

**S1. The equation used for the shaded area in Figure 2**

$$w = 7.6 \times \exp(-12.4 \times k_{550}) \quad \dots\dots\dots (\text{Saleh et al., 2018})$$

$$w = \frac{0.2081}{10^{\left(\frac{k_{550}-0.03925}{0.016}\right)+0.0699}} \quad \dots\dots\dots (\text{Saleh et al., 2014})$$

$$w = -2.64 \times \frac{k_{550}-0.004}{0.060} + 5.26 \quad \dots\dots\dots (\text{Luo et al., 2022})$$

$$w = \frac{\ln\left(\frac{k_{550}}{0.0372}\right)}{-0.468} \quad \dots\dots\dots (\text{Lu et al., 2015})$$

**S2. The equation used for the shaded area in Figure 4a**

$$k_{\text{BrC},550} = 0.016 \times \log_{10}\left(\frac{\text{BC}}{\text{OA}}\right) + 0.03925 \quad \dots\dots\dots (\text{Saleh et al., 2014})$$

$$k_{\text{BrC},550} = 0.060 \times \left(\frac{\text{BC}}{\text{OA}}\right) + 0.03925 \quad \dots\dots\dots (\text{Luo et al., 2022})$$

$$k_{\text{BrC},550} = 0.0372 \times \exp(-0.468 \times w) \quad \dots\dots\dots (\text{Lu et al., 2015})$$

**S3. The equation used for the shaded area in Figure 4b**

$$w = \frac{0.2081}{\frac{\text{BC}}{\text{OA}}+0.0699} \quad \dots\dots\dots (\text{Saleh et al., 2014})$$

$$w = -2.64 \times \frac{\text{BC}}{\text{OA}} + 5.26 \quad \dots\dots\dots (\text{Luo et al., 2022})$$

$$w = -0.607 \times \log_{10}\left(\frac{\text{BC}}{\text{OA}}\right) - 0.0251 \quad \dots\dots\dots (\text{Lu et al., 2015})$$

**Table S1.** Source-specific summary of BrC properties at 365 nm. The BRICK activity mainly uses coal but emissions differ based on the stage of firing, hence sub category indicates the stage of burning. Values in the square brackets show the standard deviation.

| Source | Fuel         | AAE <sub>365/550</sub> | MAC <sub>BrC,365</sub> | k <sub>BrC,365</sub> | W <sub>365/550</sub> |
|--------|--------------|------------------------|------------------------|----------------------|----------------------|
| AGRI   | Banana       | 6.62 [0.15]            | 1.73 [0.05]            | 0.075 [0.002]        | 5.6 [0.1]            |
| AGRI   | Cotton       | 5.34 [1.72]            | 1.73 [1.08]            | 0.076 [0.047]        | 4.3 [1.7]            |
| AGRI   | Pigeon Pea   | 3.09 [1.14]            | 4.01 [0.91]            | 0.175 [0.040]        | 2.1 [1.1]            |
| AGRI   | Wheat        | 6.21 [2.32]            | 1.64 [2.08]            | 0.071 [0.091]        | 5.2 [2.3]            |
| BRICK  | Initial      | 5.10 [2.42]            | 1.51 [1.00]            | 0.066 [0.044]        | 4.1 [2.4]            |
| BRICK  | Final        | 6.26 [1.34]            | 1.30 [0.57]            | 0.057 [0.025]        | 5.3 [1.3]            |
| BRICK  | Mid          | 4.91 [1.40]            | 1.05 [0.28]            | 0.046 [0.012]        | 3.9 [1.4]            |
| COOK   | Crop Residue | 5.52 [-]               | 1.99 [-]               | 0.087 [-]            | 4.5 [-]              |
| COOK   | Firewood     | 5.77 [0.32]            | 2.59 [0.47]            | 0.113 [0.020]        | 4.8 [0.3]            |
| COOK   | Mix          | 5.73 [0.90]            | 2.30 [0.67]            | 0.100 [0.029]        | 4.7 [0.9]            |
| HEAT   | Crop Residue | 6.40 [1.56]            | 0.46 [0.26]            | 0.020 [0.011]        | 5.4 [1.6]            |
| HEAT   | Dung Cake    | 6.26 [0.66]            | 1.79 [0.57]            | 0.078 [0.025]        | 5.3 [0.7]            |
| HEAT   | Firewood     | 6.37 [0.70]            | 2.56 [0.56]            | 0.111 [0.024]        | 5.4 [0.7]            |
| HEAT   | Mix          | 6.60 [1.80]            | 2.12 [0.79]            | 0.092 [0.034]        | 5.6 [1.8]            |

**Table S2.** Source-specific summary of BrC properties at 550 nm. The BRICK activity mainly uses coal but emissions differ based on the stage of firing, hence sub category indicates the stage of burning. Values in the square brackets show the standard deviation. Here OA is 1.8 times OC and EC is treated as BC.

| Source | Fuel         | Samples | MAC <sub>BrC,550</sub> | k <sub>BrC,550</sub> | BC to OA      |
|--------|--------------|---------|------------------------|----------------------|---------------|
| AGRI   | Banana       | 3       | 0.11 [0.004]           | 0.008 [0.001]        | 0.030 [0.013] |
| AGRI   | Cotton       | 5       | 0.27 [0.30]            | 0.018 [0.020]        | 0.408 [0.170] |
| AGRI   | Pigeon Pea   | 2       | 1.25 [0.81]            | 0.082 [0.053]        | 2.054 [0.294] |
| AGRI   | Wheat        | 3       | 0.33 [0.53]            | 0.022 [0.035]        | 0.620 [0.139] |
| BRICK  | Initial      | 7       | 0.33 [0.55]            | 0.022 [0.036]        | 0.142 [0.065] |
| BRICK  | Final        | 3       | 0.10 [0.04]            | 0.006 [0.003]        | 0.083 [0.026] |
| BRICK  | Mid          | 4       | 0.15 [0.07]            | 0.010 [0.005]        | 0.182 [0.062] |
| COOK   | Crop Residue | 1       | 0.21 [-]               | 0.014 [-]            | 0.324 [-]     |
| COOK   | Firewood     | 3       | 0.25 [0.07]            | 0.016 [0.005]        | 0.257 [0.125] |
| COOK   | Mix          | 5       | 0.22 [0.05]            | 0.014 [0.003]        | 0.126 [0.054] |
| HEAT   | Crop Residue | 2       | 0.03 [0.001]           | 0.002 [0.00]         | 0.078 [0.014] |
| HEAT   | Dung Cake    | 2       | 0.15 [0.08]            | 0.010 [0.005]        | 0.096 [0.072] |
| HEAT   | Firewood     | 8       | 0.20 [0.09]            | 0.013 [0.006]        | 0.172 [0.074] |
| HEAT   | Mix          | 2       | 0.14 [0.05]            | 0.009 [0.003]        | 0.350 [0.224] |

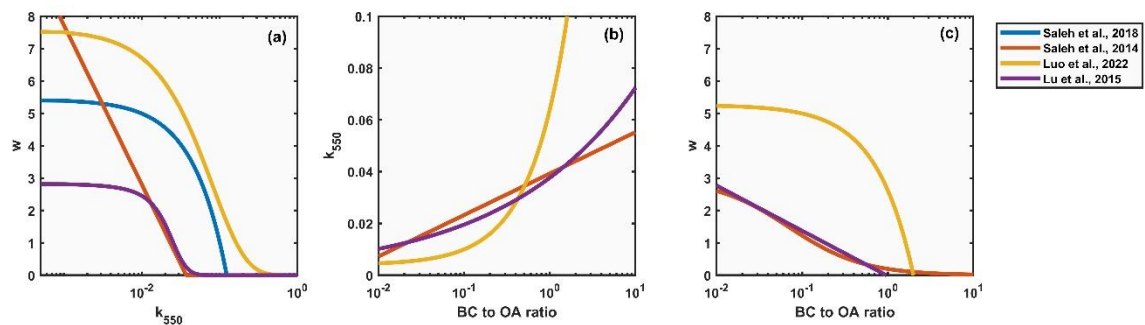

**Figure S1.** Line curves of the equations shown in the sections S1, S2, and S3.

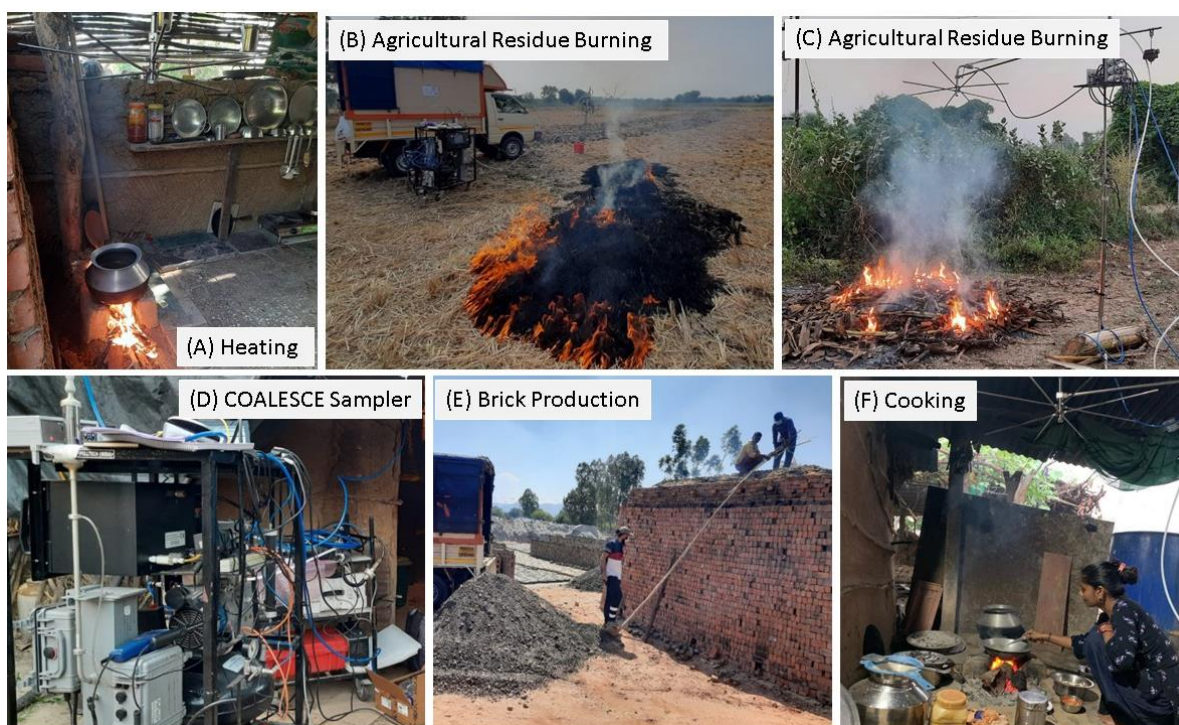

**Figure S2.** The COALESCE field measurement campaign images.

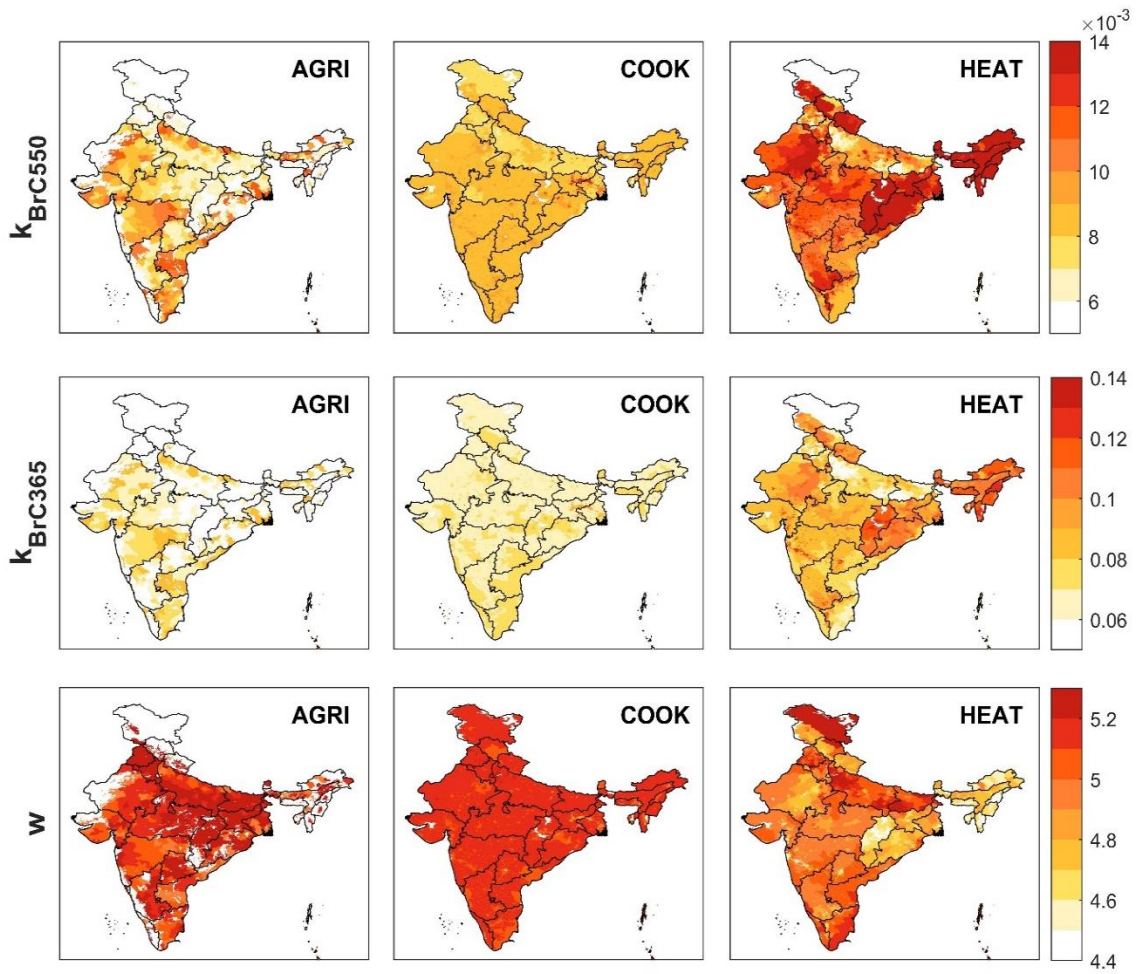

**Figure S3.** Source-specific  $k_{BrC,550}$ ,  $k_{BrC,365}$  and  $w$  over the Indian region.

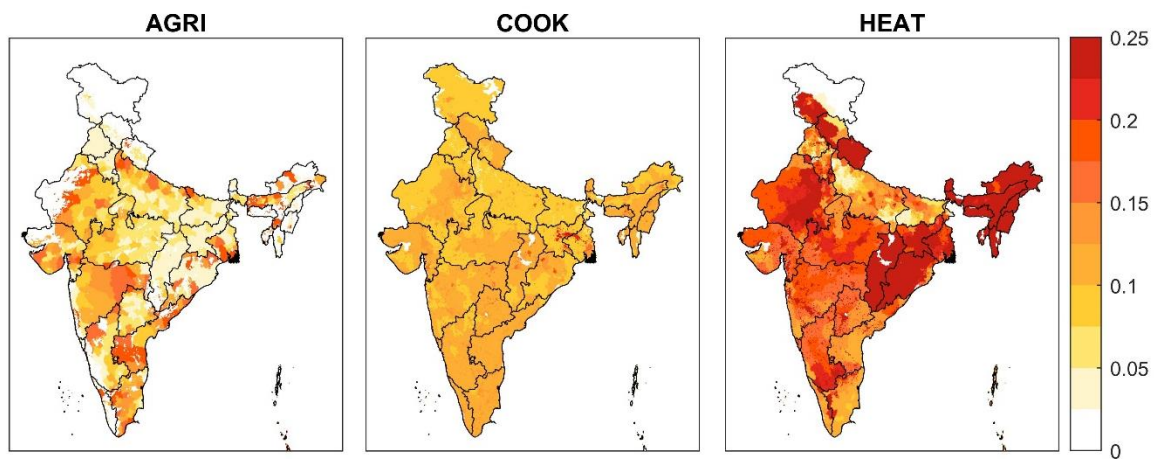

**Figure S4.** BC to OA used to estimate  $k_{BrC}$  and  $w$ .

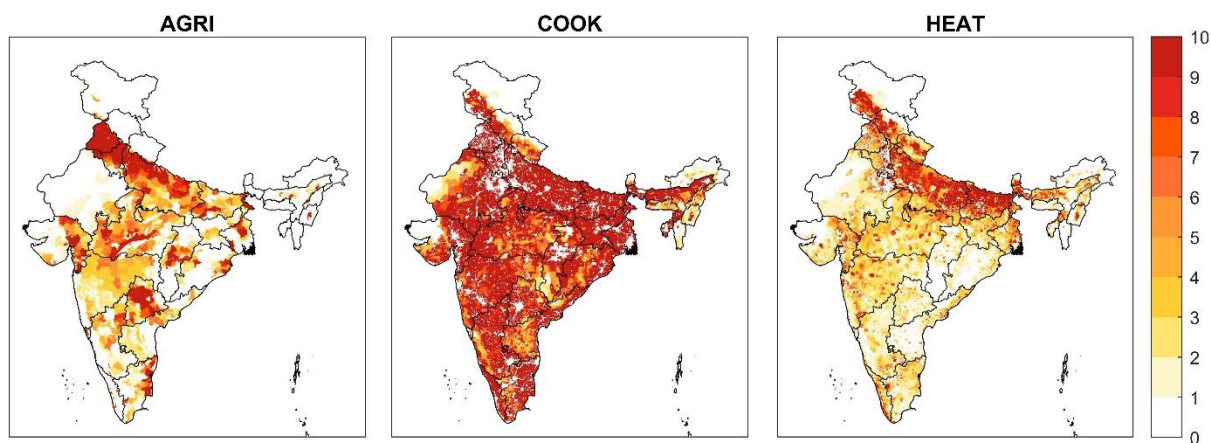

**Figure S5.** OC emissions from three major OC sources ( $\text{Mg y}^{-1} \text{ pixel}^{-1}$ ).

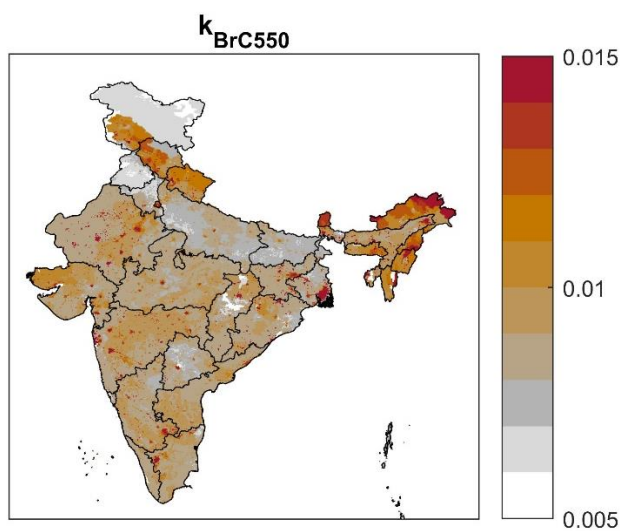

**Figure S6.**  $k_{\text{BrC},550}$  over India.



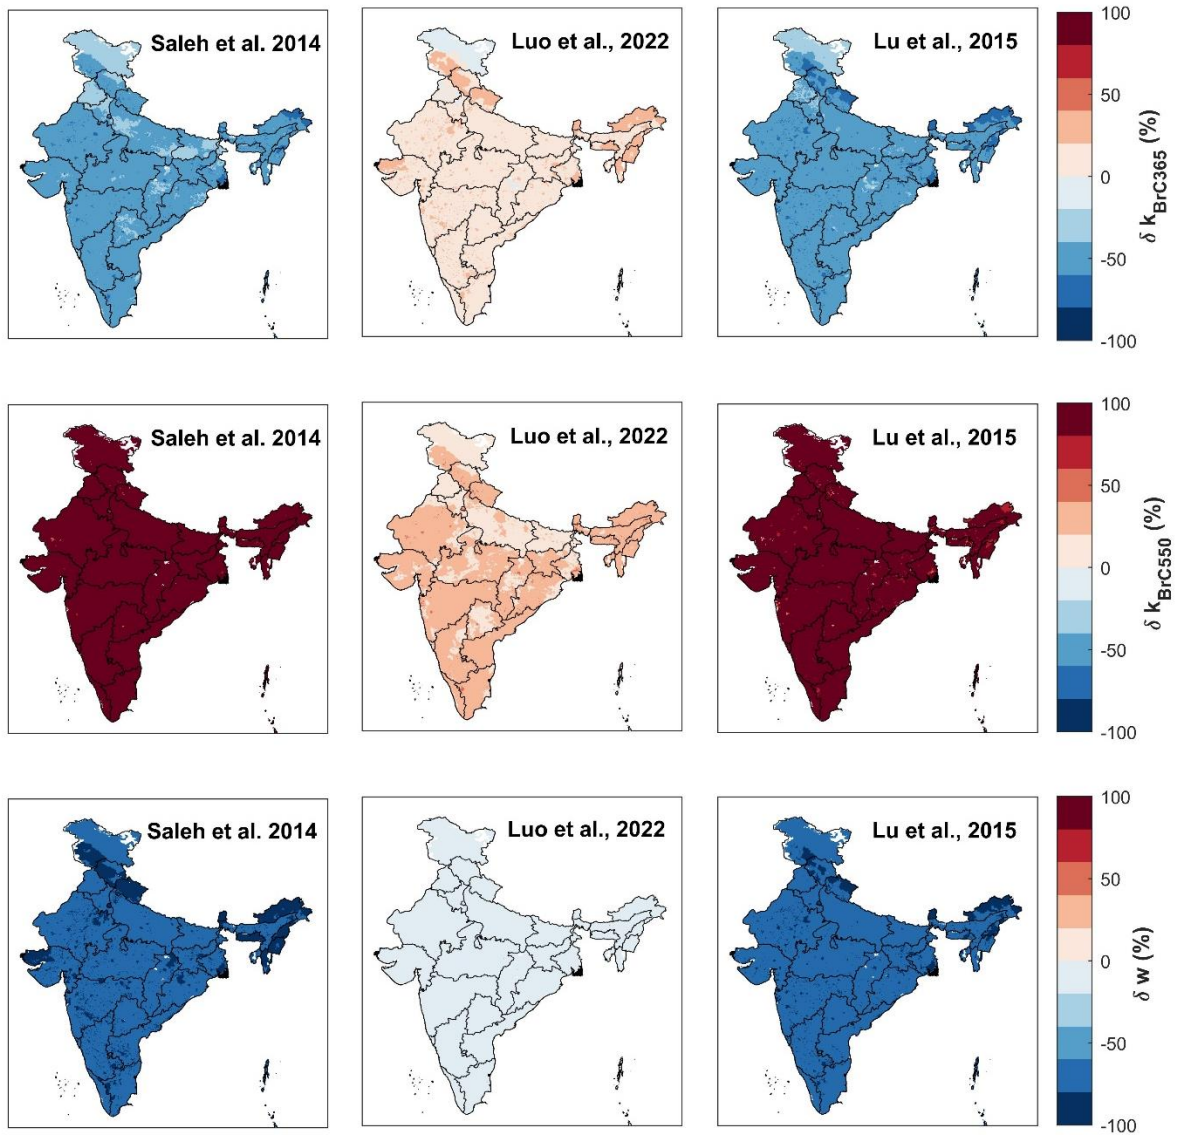

**Figure S7.** Percentage change in  $k_{BrC365}$ ,  $k_{BrC550}$  and  $w$  estimated by Saleh et al., 2014, Lou et al., 2022 and Lu et al., 2015 with reference to this study.

## References

- Lu, Z., Streets, D.G., Winijkul, E., Yan, F., Chen, Y., Bond, T.C., Feng, Y., Dubey, M.K., Liu, S., Pinto, J.P., Carmichael, G.R., 2015. Light absorption properties and radiative effects of primary organic aerosol emissions. *Environ. Sci. Technol.* 49, 4868–4877. <https://doi.org/10.1021/ACS.EST.5B00211>
- Luo, B., Kuang, Y., Huang, S., Song, Q., Hu, W., Li, W., Peng, Y., Chen, D., Yue, D., Yuan, B., Shao, M., 2022. Parameterizations of size distribution and refractive index of biomass burning organic aerosol with black carbon content. *Atmos. Chem. Phys.* 22, 12401–12415. <https://doi.org/10.5194/ACP-22-12401-2022>
- Saleh, R., Cheng, Z., Atwi, K., 2018. The Brown-Black Continuum of Light-Absorbing Combustion Aerosols. *Environ. Sci. Technol. Lett.* 5, 508–513. <https://doi.org/10.1021/acs.estlett.8b00305>
- Saleh, R., Robinson, E.S., Tkacik, D.S., Ahern, A.T., Liu, S., Aiken, A.C., Sullivan, R.C., Presto, A.A., Dubey, M.K., Yokelson, R.J., Donahue, N.M., Robinson, A.L., 2014. Brownness of organics in aerosols from biomass burning linked to their black carbon content. <https://doi.org/10.1038/NGEO2220>
